# Supplementary material for: Enhancement of emission and luminescent thermal stability of K2SiF6 : Mn4+ by synergy of co-doping with Na+ and coating with GQDs
Source: Royal Society of Chemistry journal article supplement (doi:10.1039/d2ra05527a), 2022-01-01
Supplement: d2ra05527a1.pdf [file d2ra05527a1.pdf]

## Supplementary Materials

### Enhancement of emission and luminescent thermal stability $K_2SiF_6:Mn^{4+}$ by synergy of co-doping with $Na^+$ and coating with GQDs

*Daishu Deng<sup>a</sup>, Yan Yu<sup>a</sup>, Tianman Wang<sup>a</sup>, Jun Lei<sup>a</sup>,*

*Lin Wang<sup>a</sup>, Yuelan Li<sup>a</sup>, Sen Liao<sup>\*ab</sup>, Yingheng Huang<sup>\*a</sup>.*

<sup>a</sup> *School of Chemistry and Chemical Engineering, Guangxi University, Nanning, Guangxi, 530004, China*

<sup>b</sup> *Guangxi Key Laboratory of Processing for Non-ferrous Metals and Featured Materials, School of Resources, Environment and Materials, Guangxi University, Nanning, Guangxi, 530004, China*

#### 1. Cl-contained graphene quantum dots (Cl-GQDs)

Cl-GQDs were purchased from the Nanjing XFNANO Materials Tech Co. Ltd.,  
China ([Http://www.xfnano.com](http://www.xfnano.com)).

Table 1s Essential information

| Items            | Content                                                          |
|------------------|------------------------------------------------------------------|
| Synthesis method | Hydrothermal method                                              |
| Standard         | Emitting blue light                                              |
| Purity           | ~ 80% quantum dots                                               |
| Concentration    | Standard concentration: 1 mg/mL, Maximum concentration: 20 mg/mL |
| Packaging        | Minimum package is 100 mL                                        |
| Quantum yield    | < 5%                                                             |

\* Corresponding author. Tel./Fax: +86 771 3233718, School of Chemistry and Chemical Engineering, Guangxi University, E-mail address: liaosen@gxu.edu.cn (Sen Liao), huangyingheng@163.com (Yingheng Huang).

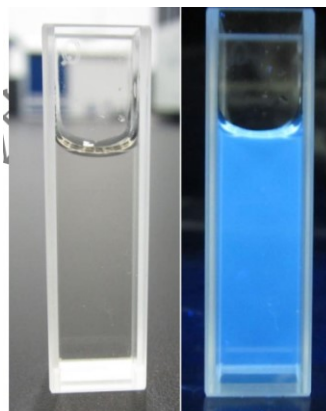

**Figure S1.** Photos, photo under the natural light (left), photo under 365 nm UV light (right) of Cl-

GQDs.

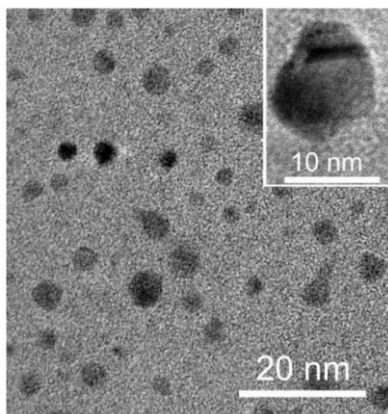

**Figure S2.** TEM image of Cl-GQDs.

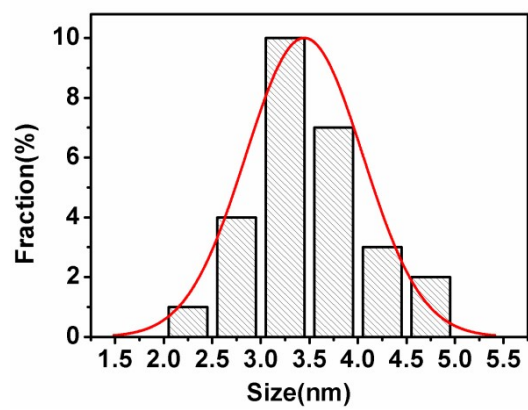

**Figure S3.** Size distribution of Cl-GQDs.

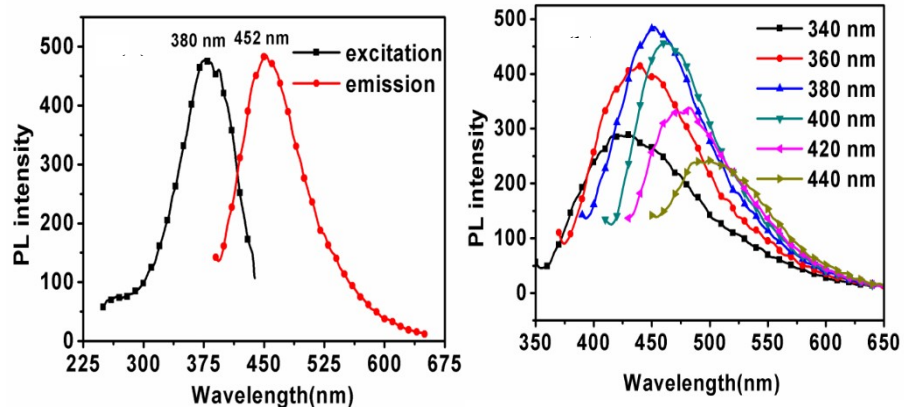

**Figure S4.** PLE&PL spectra of Cl-GQDs: a) PLE&PL spectra, b) PL spectra excited at different excitations.

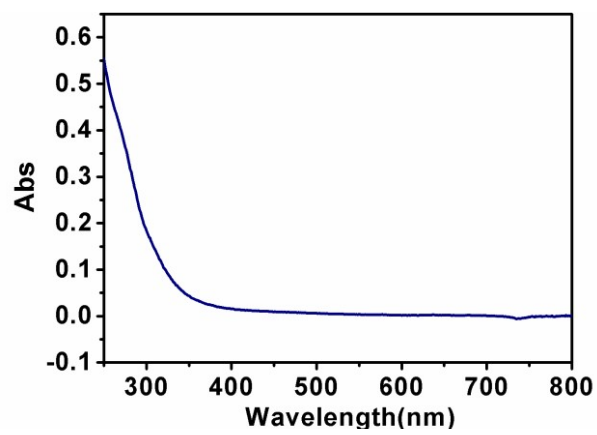

Figure S5. UV-Vis absorption spectrum of Cl-GQDs.

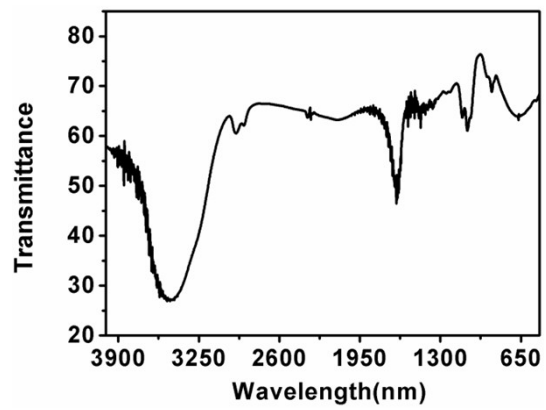

**Figure S6.** FT-infrared spectrum of Cl-GQDs.

## 2. Experimental and methodology

### 2.1. Reagent and apparatus

Cl-GQDs (Cl-contained graphene quantum dots) were purchased from the Nanjing XFNANO Materials Tech Co. Ltd., China (Supplementary materials). Besides, most of the chemical reagents were analytical reagents and purchased from the Sinopharm Chemical Reagent Co. Ltd., China. The elemental contents of samples were identified by the Perkin-Elmer Optima 3100 RL inductively coupled plasma atomic emission spectrometry (ICP-AES). Firstly, the samples were dissolved in 10 mL HCl solution ( $V_{\text{HCl}}/V_{\text{H}_2\text{O}} = 1:1$ ). Then the solution was diluted to 100 mL with deionized water. Finally, the contents of metal element in the solution were determined with ICP-AES. X-ray diffraction (XRD) was examined by Rigaku D/max 2500 V diffractometer. The morphologies of the samples were analyzed by Hitachi S-3400 scanning electron microscopy (SEM) and an attached energy-dispersive x-ray spectrometer (EDS). Samples were installed on an aluminum sheet coated with Au. The photoluminescence and photoluminescence excitation spectra (PL&PLE) at room temperature were recorded by using a Horiba Fluoro Max-4-R F6000 spectrophotometer. The luminescent decay curves were measured by an Edinburgh FLS980 fluorescence spectrophotometer. The internal quantum yield of the samples were measured by an Edinburgh FLS980 fluorescence spectrophotometer by recording excitation and emission intensities with and without the samples. Fourier Transform Infrared Spectroscopy (FT-IR) was registered by a Bruker Tensor 27 Spectrometer (Germany) with a KBr disc in the



wavelength range of 4000–400  $\text{cm}^{-1}$ . TG was measured by a NETZSCH STA 409 PC/PG thermogravimetric analyzer. The sample powder with a mass of  $10 \pm 0.1$  mg was used in the experiment, and the sample was loaded without being pressed into a platinum crucible, and the heating rate was  $10$   $^{\circ}\text{C}/\text{min}$ . The protective atmosphere was pure nitrogen gas (99.999%) with flow rate of  $20$  ml/min. The performances of WLEDs were determined by an auto-temperature LED optoelectronic analyser (LATA-1000, Everfine). X-ray Photoelectron Spectroscopy (XPS) were made with a Thermo Scientific K-Alpha X-ray Photoelectron Spectroscopy energy spectrometer.

## 2.2. Preparation of samples

### 2.2.1. $\text{KSF}:x\text{Na}^+$

Sample of  $\text{KSF}:0.10\text{Na}^+$  was synthesized as follows: First,  $95$  mmol ( $13.13$  g)  $\text{K}_2\text{CO}_3$ ,  $5$  mmol ( $0.53$  g)  $\text{Na}_2\text{CO}_3$  and  $21$  ml  $\text{H}_2\text{O}$  were mixed with stirring to obtain a solution. Then,  $200$  mmol ( $28.86$  g) of  $\text{H}_2\text{SiF}_6$  (50%) was slowly added to the solution with stirring. Grind the mixture with agate mortar for  $1$  h. Finally,  $\text{KSF}:0.10\text{Na}^+$  was obtained by drying the mixture at  $120$   $^{\circ}\text{C}$  for  $3$  h. Samples of  $\text{KSF}:x\text{Na}^+$  ( $x = 0.02$ – $0.14$ ) were synthesized in the same way as  $\text{KSF}:0.10\text{Na}^+$ .

### 2.2.2. $\text{KSF}:y\text{Mn}^{4+}$

Sample of  $\text{KSF}:y\text{Mn}^{4+}$  was synthesized as follows: First,  $1.8$  mmol ( $0.2845$  g)  $\text{KMnO}_4$ ,  $0.5$  g  $\text{KF}\cdot 2\text{H}_2\text{O}$ ,  $16$  ml of  $\text{HF}$  (40%) were mixed with stirring until the  $\text{KMnO}_4$  was completely dissolved. Then,  $28.2$  mmol ( $6.21$  g)  $\text{KSF}$  powder ( $y/I =$  atomic ratio of  $\text{Mn}/(\text{Mn}+\text{Si}) = 0.06$ ) was added to the potassium permanganate solution and stirred for

48 h at room temperature. Finally, the crystals were collected, washed several times with absolute ethanol and the sample (i) (  $\text{KSF:y/Mn}^{4+}$ ,  $y = 0.06$  ) was obtained after drying at 70 °C for 3 h. Samples of  $\text{KSF:y/Mn}^{4+}$  ( $y = 0.01-0.12$ ) were synthesized in the same way as  $\text{KSF:y/Mn}^{4+}$ .

### 2.2.3. $\text{KSF:y/Mn}^{4+},x\text{Na}^+$

Sample of  $\text{KSF:y/Mn}^{4+},0.10\text{Na}^+$  was synthesized as follows: First, 1.8 mmol (0.2845 g)  $\text{KMnO}_4$ , 0.5 g  $\text{KF}\cdot 2\text{H}_2\text{O}$  , 16 ml HF (40%) were mixed with stirring until the  $\text{KMnO}_4$  was completely dissolved. Then, 28.2 mmol (6.17 g)  $\text{KSF}:0.10\text{Na}^+$  powder was added to potassium permanganate solution and stirred for 48 h at room temperature. Finally, the crystals were collected, and washed several times with absolute ethanol and the sample (ii) ( $\text{KSF:y/Mn}^{4+},0.10\text{Na}^+$ ) was obtained after drying at 70 °C for 3 h. Samples of  $\text{KSF:y/Mn}^{4+},x\text{Na}^+$  ( $y = 0.01-0.12$ ,  $x = 0.02-0.14$ ) were synthesized in the same way as  $\text{KSF:y/Mn}^{4+},0.10\text{Na}^+$ .

### 2.2.4. $\text{KSF:y/Mn}^{4+},0.10\text{Na}^+@\text{GQDs}$ $z \text{ mg/mol}$

Sample of  $\text{KSF:y/Mn}^{4+},0.10\text{Na}^+@\text{GQDs}$   $10 \text{ mg/mol}$  was synthesized as follows: (1) First, 10 ml HF (40%), 0.5 g  $\text{KF}\cdot 2\text{H}_2\text{O}$  were dissolved to give a solution, then 20 mmol (4.41 g)  $\text{KSF:y/Mn}^{4+},0.10\text{Na}^+$  powder was added into the solution and fully mixed to get mixture (I). (2) Then, 200  $\mu\text{l}$  (10 mg/ml) GQDs were mixed with 5 ml HF (40%) in a hydrothermal tank. (3) Third, under stirring, the mixture (I) was added to the hydrothermal tank. The hydrothermal tank was placed in an oven and kept at 120 °C for 3 h. (4) Finally, the crystals were collected, washed several times with absolute ethanol

and the sample (iii) (KSF:y/Mn<sup>4+</sup>,0.10Na<sup>+</sup>@GQDs<sub>10 mg/mol</sub>) was obtained after drying at 70 °C for 3h. Samples of KSF:y/Mn<sup>4+</sup>,0.10Na<sup>+</sup>@GQDs<sub>z mg/mol</sub> (z = 0-16 mg/mol) were synthesized in the same way as KSF:y/Mn<sup>4+</sup>,0.10Na<sup>+</sup>@GQDs<sub>10 mg/mol</sub>.

### 3. Mathematical calculation methods

#### 3.1 Color purity

The formula (Eq. S1) is used to calculating color purity:<sup>[37–39]</sup>

$$C_p = \frac{\sqrt{(x - x_i)^2 + (y - y_i)^2}}{\sqrt{(x_d - x_i)^2 + (y_d - y_i)^2}} \times 100\% \quad (\text{S1})$$

Here (x, y) stands for the chromaticity coordinates of the sample; (x<sub>i</sub>, y<sub>i</sub>) stands for the CIE of an equal-energy illuminant with a value of (0.33, 0.33); and (x<sub>d</sub>, y<sub>d</sub>) stands for the color coordinates corresponding to the dominant wavelength of the excitation.

#### 3.2 Fluorescence lifetime

The luminescence decay curve of the sample can be well fitted by linear equation (Eq. (S3)), which is transformed from Eq. (S2):<sup>[40]</sup>

$$y_t = A1 * \exp(-x/\tau) + y_0 \quad (\text{S2})$$

$$\text{Ln}(y_t - y_0) = A1 - x/\tau \quad (\text{S3})$$

#### 3.3 Critical distance (R<sub>c</sub>)

The quenching mechanism of Mn<sup>4+</sup> concentration in KSF:yMn<sup>4+</sup> is explored by the

critical distance ( $R_c$ ) between  $Mn^{4+}$  ions. The Eq. (S4)<sup>[39]</sup> is use to calculated the  $R_c$ .

$$R_c \approx 2 \left[ \frac{3V}{4\pi x_c N} \right]^{1/3} \quad (S4)$$

Where  $V$ ,  $x_c$ , and  $N$  are the unit cell volume of the sample, the critical concentration of  $Mn^{4+}$  and the number of sites that activators can substitute per unit, respectively.

### 3.4 Multipolar interaction type

Eq. (S5)<sup>[31,41]</sup> is used to estimate the multipolar interaction type for the sample.

$$\frac{I}{x} = k [1 + \beta(x)^{\theta/3}]^{-1} \quad (S5)$$

Where  $I$  is the PL intensity of the sample,  $x$  is the  $Mn^{4+}$  concentration ( $x \geq x_c$ ). The  $\beta$  and  $k$  are constants for the same test condition. When  $\theta$  are 6, 8 and 10, the corresponding mechanisms are the dipole-dipole, dipole–quadrupole, and quadrupole–quadrupole interactions, respectively.

### 3.5 Negative thermal quenching behaviors of the anti-Stokes and the Stokes transitions

Negative thermal quenching behaviors of the anti-Stokes and the Stokes transitions can be expressed with Eqs. (S6-S7).<sup>[36]</sup>

$$W_s(T) = D \cdot \frac{\exp\left(\frac{\hbar\omega}{kT}\right)}{\exp\left(\frac{\hbar\omega}{kT}\right) - 1} \quad (S6)$$

$$W_a(T) = D \cdot \frac{1}{\exp\left(\frac{\hbar\omega}{kT}\right) - 1}$$

(S7)

Here,  $k$ ,  $T$ ,  $D$  and  $\hbar\omega$  are the Boltzmann constant, temperature, the proportional coefficient and the coupled vibronic mode, respectively.

### 3.6 $\Delta E$ (chromaticity shift)

$\Delta E$  (chromaticity shift) at different temperatures is calculate with Eq. (S8)<sup>[42,43]</sup>.

$$\Delta E = \sqrt{(u'_t - u'_0)^2 + (v'_t - v'_0)^2 + (w'_t + w'_0)^2} \quad (\text{S8})$$

Where  $v' = 9y/(3 - 2x + 12y)$ ,  $u' = 4x/(3 - 2x + 12y)$ ,  $w' = 1 - u' - v'$ .  $v'$  and  $u'$  are the chromaticity coordinates in  $u' \cdot v'$  uniform color space.  $x$  and  $y$  are the chromaticity coordinates, and  $0$  and  $t$  are the chromaticity shift at room temperature and a given temperature, respectively.

### 3.7 Activation energy ( $E_a$ ) of the luminescent thermal quenching

Eq. (S9) is applied to calculate the  $E_a$  of the luminescent thermal quenching. Eq. (S10) can be transformed from Eq. (S9).<sup>[44,45]</sup>

$$I_T = \frac{I_0}{1 + A \exp\left(-\frac{E_a}{k_B T}\right)} \quad (\text{S9})$$

$$\text{Ln}\left(\frac{I_0}{I_T} - 1\right) = \text{Ln}A - \frac{E_a}{k_B T} \quad (\text{S10})$$

Here,  $I_0$  and  $I_T$  are the initial emission intensity and the intensity at different temperatures, respectively.  $A$  and  $k_B$  are a constant and the Boltzmann constant ( $8.617 \times 10^{-5}$  eV/K), respectively.
